# Supplementary material for: Differences in MTHFR and LRRK2 variant’s association with sporadic Parkinson’s disease in Mexican Mestizos correlated to Native American ancestry
Source: PubMed Central journal article supplement (PMC7878860; doi:10.1038/s41531-021-00157-y), 2021-02-11
Supplement: 41531_2021_157_MOESM1_ESM.pdf [file 41531_2021_157_MOESM1_ESM.pdf]

Supplementary Material

Supplementary Tables

| Table 1. Clinical and demographic characteristic of the study population                                                                                                                                                                                                                                                                                                         |                             |                       |                   |                            |                        |                    |
|----------------------------------------------------------------------------------------------------------------------------------------------------------------------------------------------------------------------------------------------------------------------------------------------------------------------------------------------------------------------------------|-----------------------------|-----------------------|-------------------|----------------------------|------------------------|--------------------|
|                                                                                                                                                                                                                                                                                                                                                                                  | Cases                       |                       |                   | Controls                   |                        |                    |
|                                                                                                                                                                                                                                                                                                                                                                                  | Northeastern Mexico (n= 75) | Central Mexico (n=43) | p                 | Northeastern Mexico (n=92) | Central Mexico (n=101) | p                  |
| Sex ratio: Males n(%)                                                                                                                                                                                                                                                                                                                                                            | 38 (50)                     | 22 (51)               | 0.99 <sup>2</sup> | 44 (47)                    | 53 (52)                | 0.15 <sup>2</sup>  |
| Average age at enrollment (range)                                                                                                                                                                                                                                                                                                                                                | 70.77 [62-79]               | 68.44 [63-72]         | 0.18 <sup>1</sup> | 71.1 [64-77.5]             | 68.61 [63-73]          | 0.07 <sup>1</sup>  |
| BMI, kg/m <sup>2</sup>                                                                                                                                                                                                                                                                                                                                                           | 27.83 [24 -31]              | 26.60 [24-29]         | 0.43 <sup>1</sup> | 27.03 [23-30]              | 27.33 [24-30]          | 0.33 <sup>1</sup>  |
| Total cholesterol, mg/dl                                                                                                                                                                                                                                                                                                                                                         | 174 [133-207]               | 179[153-206]          | 0.60 <sup>1</sup> | 188 [167-215]              | 202 [172-226]          | 0.06 <sup>1</sup>  |
| Glucose, mg/dl                                                                                                                                                                                                                                                                                                                                                                   | 104 [83-105]                | 99.12[91-103]         | 0.21 <sup>1</sup> | 108 [86-107]               | 112 [94-114]           | 0.002 <sup>1</sup> |
| Uric acid, mg/dl                                                                                                                                                                                                                                                                                                                                                                 | 5.17 [4.4-5.9]              | 5.33 [4-6.39]         | 0.25 <sup>1</sup> | 5.93 [5.0-6.9]             | 6.12 [5.1.7.1]         | 0.45 <sup>1</sup>  |
| Cognitive impairment n(%) (by MMSE-test)                                                                                                                                                                                                                                                                                                                                         | 26 (34%)                    | 11 (25%)              | 0.40 <sup>2</sup> | 20 (21%)                   | 31 (30%)               | 0.19 <sup>2</sup>  |
| Age at onset, years                                                                                                                                                                                                                                                                                                                                                              | 63.9 [55-72]                | 64.4 [58-69]          | 0.84 <sup>1</sup> |                            |                        |                    |
| UPDRS total score                                                                                                                                                                                                                                                                                                                                                                | 74 [44-92.5]                | 68.4 [39-88]          | 0.46 <sup>1</sup> |                            |                        |                    |
| UPDRS III score                                                                                                                                                                                                                                                                                                                                                                  | 40.6 [23-5]                 | 40.1 [20-53.5]        | 0.88 <sup>1</sup> |                            |                        |                    |
| HY scale                                                                                                                                                                                                                                                                                                                                                                         | 2.7 [2-3]                   | 2.7 [2-3]             | 0.84 <sup>1</sup> |                            |                        |                    |
| Shows mean values (Interquartile range) and frequency (%). p values were determined with U Mann-Whitney <sup>1</sup> and Fisher's exact <sup>2</sup> tests. BMI: Body Mass Index HAM-D: Hamilton Depression Rating Scale, MMSE: Minimal state exam, UPDRS: Unified Parkinson's Disease Rating Scale total score and score Part III — Motor Examination, HY =Hoehn and Yahr scale |                             |                       |                   |                            |                        |                    |

Table 2. Odds ratio estimates by percentage of Native American ancestry for remaining non-significant SNPs

| Gene ID marker   | Group1<br>(32-52%) | p    | Group 2<br>(52.1 - 58.5%) | p    | Group 3<br>(56.6 – 65%) | p    | Group 4<br>(≥66%) | p    |
|------------------|--------------------|------|---------------------------|------|-------------------------|------|-------------------|------|
| USP24 rs13312    | 0.54[0.15-1.95]    | 0.35 | 3.25[0.15-1.93]           | 0.40 | 0.49[0.10-2.18]         | 0.31 | 0.93[0.27-3.23]   | 0.92 |
| PARK7 rs3766606  | 1.49[0.58-3.84]    | 0.41 | 0.39[0.08-1.82]           | 0.23 | 0.68[0.20-2.26]         | 0.54 | 0.69[0.16-2.97]   | 0.63 |
| NUCKS rs823128   | 0.48[0.14-1.59]    | 0.23 | 0.79[0.29-1.71]           | 0.35 | 1.05[0.38-2.86]         | 0.92 | 1.40[0.64-3.05]   | 0.4  |
| SLC41A1 rs823156 | 0.49[0.20-1.17]    | 0.11 | 0.71[0.29-1.71]           | 0.50 | 1.32[0.64-2.72]         | 0.44 | 0.74[0.34-1.60]   | 0.45 |
| DRD3 rs6280      | 0.90[0.96-1.78]    | 0.77 | 0.87[0.44-1.72]           | 0.70 | 0.75[0.40-1.41]         | 0.38 | 0.70[0.35-1.41]   | 0.33 |
| GSK3B rs334558   | 0.96[0.48-1.96]    | 0.92 | 1.53[0.80-2.92]           | 0.20 | 0.65[0.31-1.36]         | 0.26 | 1.62[0.76-3.47]   | 0.22 |
| FAM47E rs6812193 | 1.20[0.60-2.38]    | 0.60 | 1.29[0.58- 2.88]          | 0.52 | 0.86[0.36-2.01]         | 0.73 | 1.62[0.60-4.32]   | 0.33 |
| SNCA rs356219    | 0.7[0.36-1.38]     | 0.31 | 0.84[ 0.44-1.59]          | 0.60 | 0.71[0.35-1.47]         | 0.37 | 1.04[0.50-2.17]   | 0.9  |
| PARK2 rs1801474  | 1.44[0.54-3.78]    | 0.47 | 1.32[0.54-3.24]           | 0.53 | 0.75[0.29-1.91]         | 0.55 | 0.85[0.32-2.05]   | 0.73 |
| PARK2 rs1801582  | 1.43[0.54-3.78]    | 0.46 | 0.94[ 0.36-2.46]          | 0.91 | 0.97[0.37-2.53]         | 0.96 | 0.90[0.20-4.04]   | 0.94 |
| ANKK1 rs1800497  | 1.52[0.74-3.14]    | 0.25 | 1.52[0.39-1.56]           | 0.41 | 0.88[0.48-1.63]         | 0.70 | 0.72[0.38-1.37]   | 0.32 |
| SLC2A13rs1994090 | 0.99[0.33-2.93]    | 0.99 | 0.68[0.25- 1.83]          | 0.45 | 1.47[0.54-4.12]         | 0.46 | 2.26[0.82-6.24]   | 0.33 |
| SREBF1rs11868035 | 0.80[0.39-1.64]    | 0.55 | 0.57[0.19-1.69]           | 0.32 | 2.32[0.82-6.53]         | 0.11 | 0.84[0.27-2.58]   | 0.13 |
| MAPT rs242562    | 0.88[0.44-1.73]    | 0.71 | 0.80[ 0.34-1.87]          | 0.62 | 0.58[0.27-1.23]         | 0.16 | 0.55[0.26-1.18]   | 0.11 |

OR estimation using an additive model, adjusted by sex and age. Group 1 n=78 subjects with 32 - 52% Native American ancestry; Group 2 n=78 subjects with 52.1% - 56.5% Native American ancestry; Group 3 n=78 subjects with 56.6 - 65% Native American ancestry; Group 4 n=77 subjects with ≤66% Native American ancestry.

| Table 3. Summary characteristics of studies included in the meta-analysis of MTHFR rs1801133 and PD risk |      |             |           |     |                 |             |          |                 |            |      |
|----------------------------------------------------------------------------------------------------------|------|-------------|-----------|-----|-----------------|-------------|----------|-----------------|------------|------|
| Author                                                                                                   | Year | Country     | Ethnicity | PD  |                 |             | Controls |                 |            | HWE  |
|                                                                                                          |      |             |           | n   | Gender (% Male) | Age         | n        | Gender (% Male) | Age        |      |
| De Lau et al.                                                                                            | 2005 | Netherlands | European  | 65  | 46%             | 74.9±7.2    | 5855     | 32%             | 68.7±8.6   | 0.21 |
| Wullner et al.                                                                                           | 2005 | Germany     | European  | 342 | 71%             | 59.9±9.0    | 342      | 50%             | 58±16      | nd   |
| Religa et al.                                                                                            | 2006 | Poland      | European  | 114 | nd              | 69.9        | 100      | nd              | 71.2       | 1    |
| Rodriguez-Oroz et al.                                                                                    | 2006 | Spain       | European  | 77  | 58%             | 69.9±6.5    | 28       | 51.70%          | 68.5 ±3    | 0.72 |
| Todrovic et al.                                                                                          | 2006 | Serbia      | European  | 113 | 56%             | 61.1±9.0    | 53       | 64%             | 60.8±13.1  | 0.78 |
| Caccamo et al.                                                                                           | 2007 | Italy       | European  | 49  | 45%             | 64.2±7.5    | 86       | 47%             | 64.1±7.1   | 0.6  |
| Dorszewska et al.                                                                                        | 2007 | Poland      | European  | 98  | 62%             | 60.8±10.7   | 50       | 32%             | 44.6±16.2  | 0.71 |
| Camicioli et al.                                                                                         | 2009 | Canada      | European  | 51  | 59%             | 71.5±4.7    | 49       | 58%             | 71.6±4.9   | 0.78 |
| Bialecka et al.                                                                                          | 2012 | Poland      | European  | 320 | 51%             | 64.4±10.1   | 254      | 54%             | 64.8±9.6   | 0.88 |
| Gorgone et al.                                                                                           | 2012 | Italy       | European  | 60  | 45%             | 64.5±7.7    | 82       | 45%             | 64.1±7.2   | 0.49 |
| Zahra et al.                                                                                             | 2016 | Malta       | European  | 151 | 62%             | 72.9        | 311      | 55.70%          | 74.3       | 0.38 |
| Yasui et al.                                                                                             | 2000 | Japan       | Asian     | 90  | 34%             | 64.8±12.6   | 53       | 26%             | 67.8±12.2  | 0.25 |
| Lin et al.                                                                                               | 2007 | Taiwan      | Asian     | 94  | 45%             | 69.5± 7.51  | 146      | 47%             | 68.5± 6.1  | 0.6  |
| Kumudini et al.                                                                                          | 2008 | India       | Asian     | 151 | nd              | nd          | 416      | nd              | nd         | 0.72 |
| Yuan et al.                                                                                              | 2009 | Taiwan      | Asian     | 76  | 47%             | 71.3±9.8    | 110      | 44%             | 69.9±8.4   | 0.61 |
| Fong et al.                                                                                              | 2010 | Taiwan      | Asian     | 211 | 48%             | 71.2±8.4    | 218      | 47%             | 71.0±6.4   | 0.47 |
| Yaun et al .                                                                                             | 2015 | China       | Asian     | 512 | 60%             | 65.8±10.3   | 512      | 60%             | 65.9±10.5  | 0.41 |
|                                                                                                          |      |             | Mexican   |     |                 |             |          |                 |            |      |
| Garcia et al.                                                                                            | 2015 | Mexico      | mestizos  | 140 | 68%             | 65.46 ±11.5 | 216      | 65%             | 63.68± 8.8 | 0.13 |
|                                                                                                          |      |             | Mexican   |     |                 |             |          |                 |            |      |
| Present study                                                                                            | 2019 | Mexico      | mestizos  | 118 | 51%             | 69.92± 10.  | 193      | 50%             | 69.80±8.63 | 0.63 |

Table 4. Summary characteristics of studies included in the meta-analysis of LRRK2 rs1441942 and PD risk

| Author               | Year | Country                        | Ethnicity        | PD   |                 |           | Controls |                 |             | HWE  |
|----------------------|------|--------------------------------|------------------|------|-----------------|-----------|----------|-----------------|-------------|------|
|                      |      |                                |                  | n    | Gender (% Male) | Age       | n        | Gender (% Male) | Age         |      |
| Pihlstrom et al.     | 2013 | Norway, Sweden                 | European         | 1380 | 60%             | 68[32-90] | 1295     | 52%             | 66[49-91]   | ND   |
| Soto Ortolaza et al. | 2013 | Poland, Ireland, United States | European         | 1381 | 61%             | 65.9±12.0 | 1328     | 42%             | 64±17       | ND   |
| Fang et al.          | 2016 | China                          | Asian            | 583  | 45%             | 65.1±8.9  | 553      | 48.3%           | 65.37 ±9.03 | 0.67 |
| Wang et al.          | 2017 | Asian cohort                   | Asian            | 1940 | 58%             | 63        | 3273     | 58%             | 63          | 0.99 |
| Wang et al.          | 2017 | European cohort                | European         | 7715 | 46%             | 64        | 3512     | 25%             | 54          | 0.63 |
| Present study        | 2019 | Mexican                        | Mexican mestizos | 118  | 50.8%           | 69.92±10  | 193      | 50.2            | 69.80± 8.63 | 0.65 |

| Table 5. Summary characteristics of included SNPs |            |     |                  |               |                                                            |              |                       |
|---------------------------------------------------|------------|-----|------------------|---------------|------------------------------------------------------------|--------------|-----------------------|
| No                                                | ID SNP     | Chr | Position in (bp) | Gene          | Gene classification                                        | Variant type | Alleles (minor/major) |
| 1                                                 | rs1801133  | 1   | 11796321         | MTHFR         | Metabolism                                                 | missense     | T/C                   |
| 2                                                 | rs13312    | 1   | 55067069         | UPS24         | Ubiquitin specific peptidases                              | 3'-UTR       | G/C                   |
| 3                                                 | rs3766606  | 1   | 7962137          | PARK7         | PD associated gene                                         | intron       | T/G                   |
| 4                                                 | rs823128   | 1   | 205744250        | NUCKS1        | Transcription regulation gene                              | intron       | G/A                   |
| 5                                                 | rs823156   | 1   | 205795512        | SLC41A1       | Membrane trafficking and solute carriers                   | intron       | G/A                   |
| 6                                                 | rs334558   | 3   | 120094435        | GSK3B         | Proteins with kinase activity                              | 5'UTR        | A/G                   |
| 7                                                 | rs6280     | 3   | 114171968        | DRD3          | Neurotransmitter receptors in signal transduction pathways | missense     | C/T                   |
| 8                                                 | rs6812193  | 4   | 77198986         | FAM47E/SCARB2 | PD risk factors identified by a GWAS                       | intron       | T/C                   |
| 9                                                 | rs356219   | 4   | 89716450         | SNCA          | PD associated gene                                         | intron       | A/G                   |
| 10                                                | rs1801582  | 6   | 161386823        | PARK2         | PD associated gene                                         | missense     | G/C                   |
| 11                                                | rs1801474  | 6   | 162201165        | PARK2         | PD associated gene                                         | missense     | T/C                   |
| 12                                                | rs1800497  | 11  | 113400106        | ANKK1         | Neurotransmitter receptors in signal transduction pathways | missense     | A/G                   |
| 13                                                | rs1491942  | 12  | 40227006         | LRRK2         | PD associated gene                                         | intron       | G/C                   |
| 14                                                | rs1994090  | 12  | 40034759         | LRRK2         | PD associated gene                                         | intron       | G/T                   |
| 15                                                | rs242562   | 17  | 45949373         | MAPT          | Membrane trafficking and solute carriers                   | intron       | G/A                   |
| 16                                                | rs11868035 | 17  | 17811787         | RAIL/SREBF1   | PD risk factors identified by a GWAS                       | intron       | G/A                   |

ID SNP= Identifier of Single Nucleotide Polymorphism, Chr = Chromosome; Variant types: 3'-UTR = 3'-untranslated region; 5'-UTR = 5'-untranslated region

Supplementary Figures

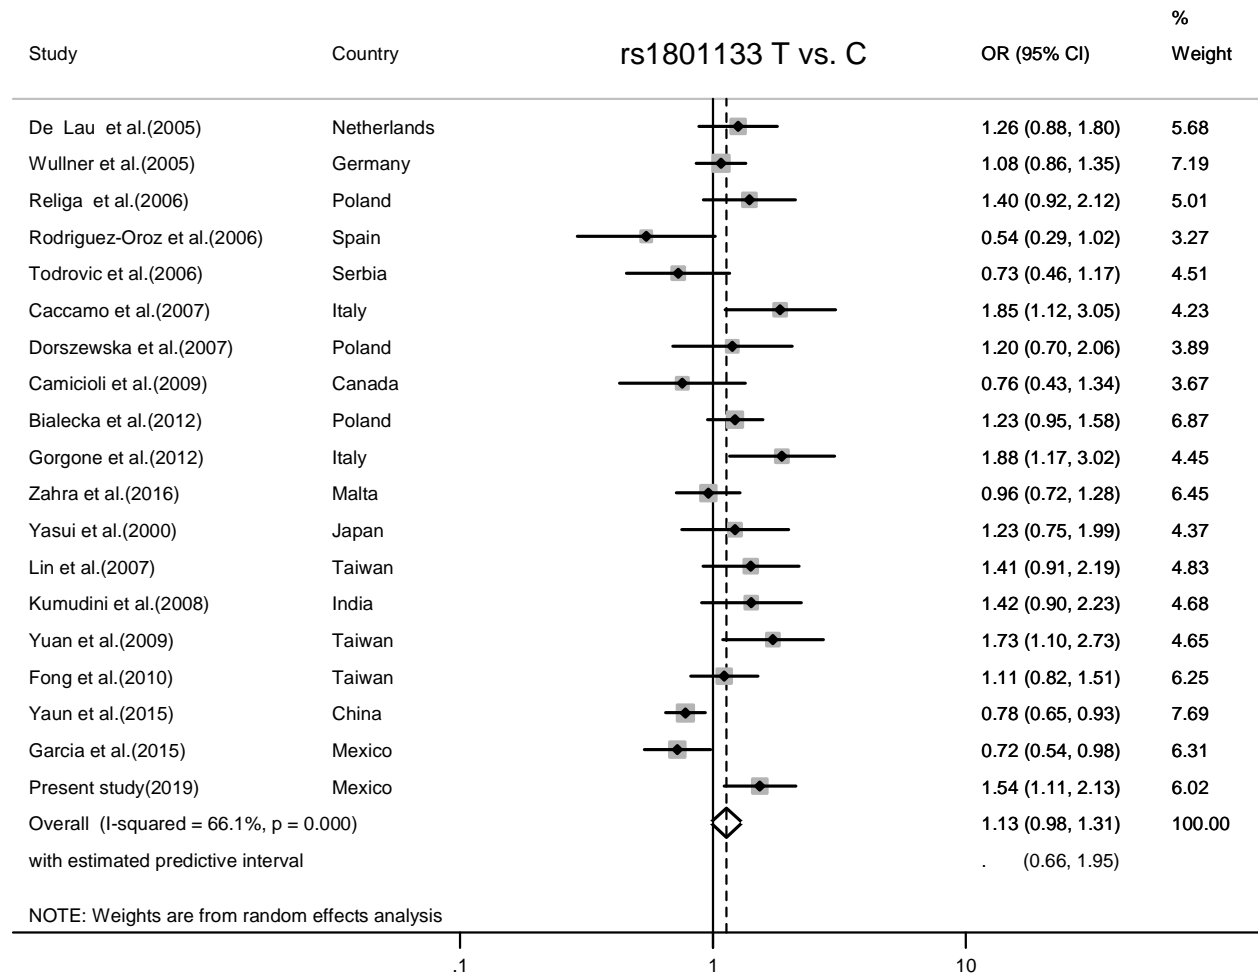

Figure 1. Forest plots from the meta-analysis of MTHFR rs1801133 allele’s PD-risk association in the combined sample. “OR” odds ratio.

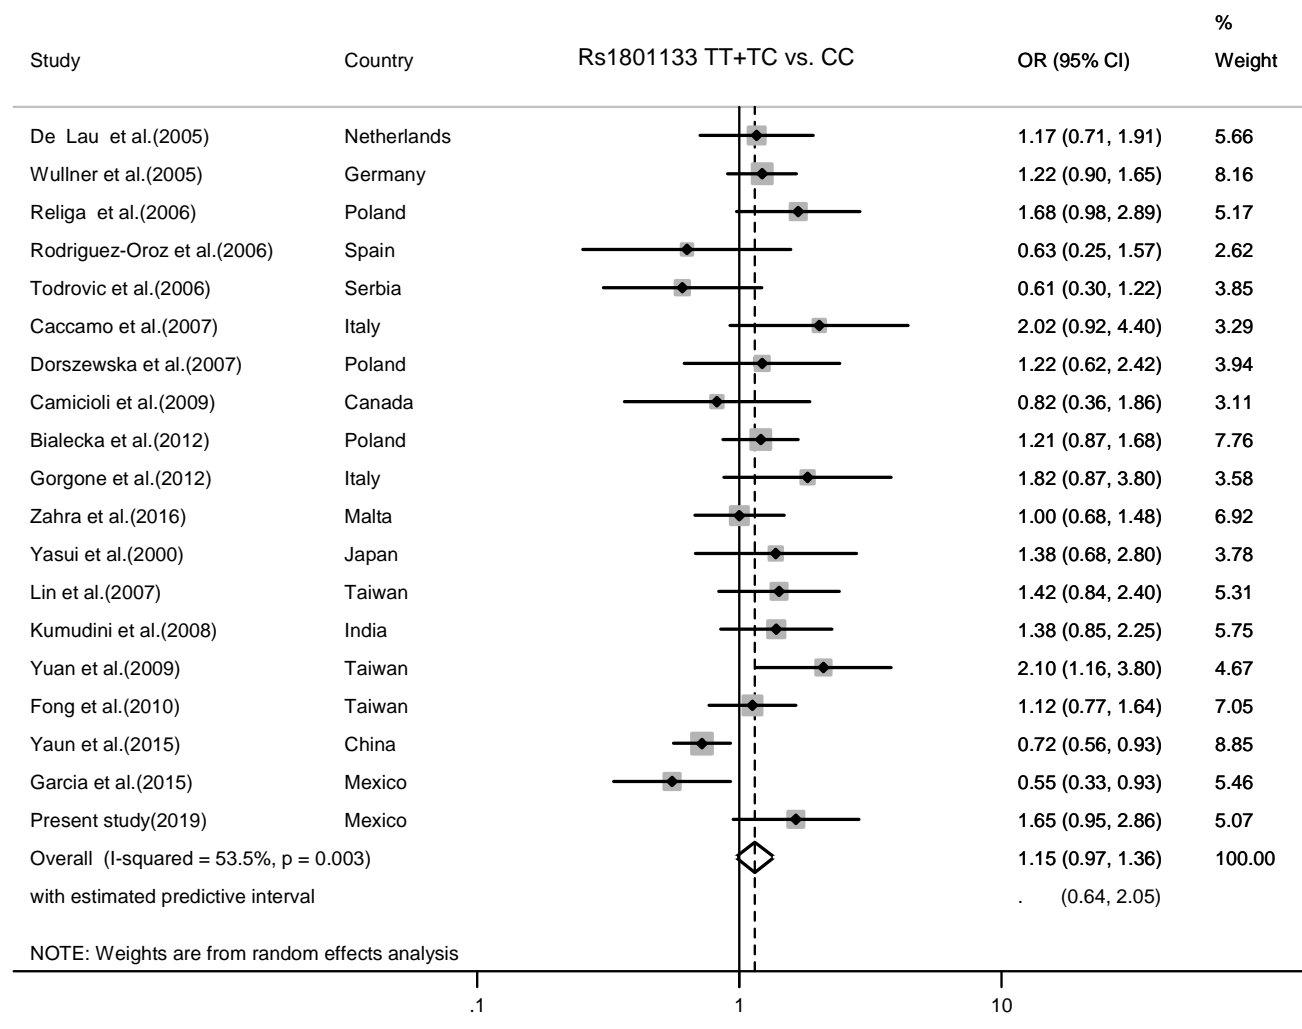

Figure 2. Forest plots from the meta-analysis of MTHFR rs1801133 (TT+TC vs. CC) genotypes' PD-risk association in the combined sample. "OR" odds ratio

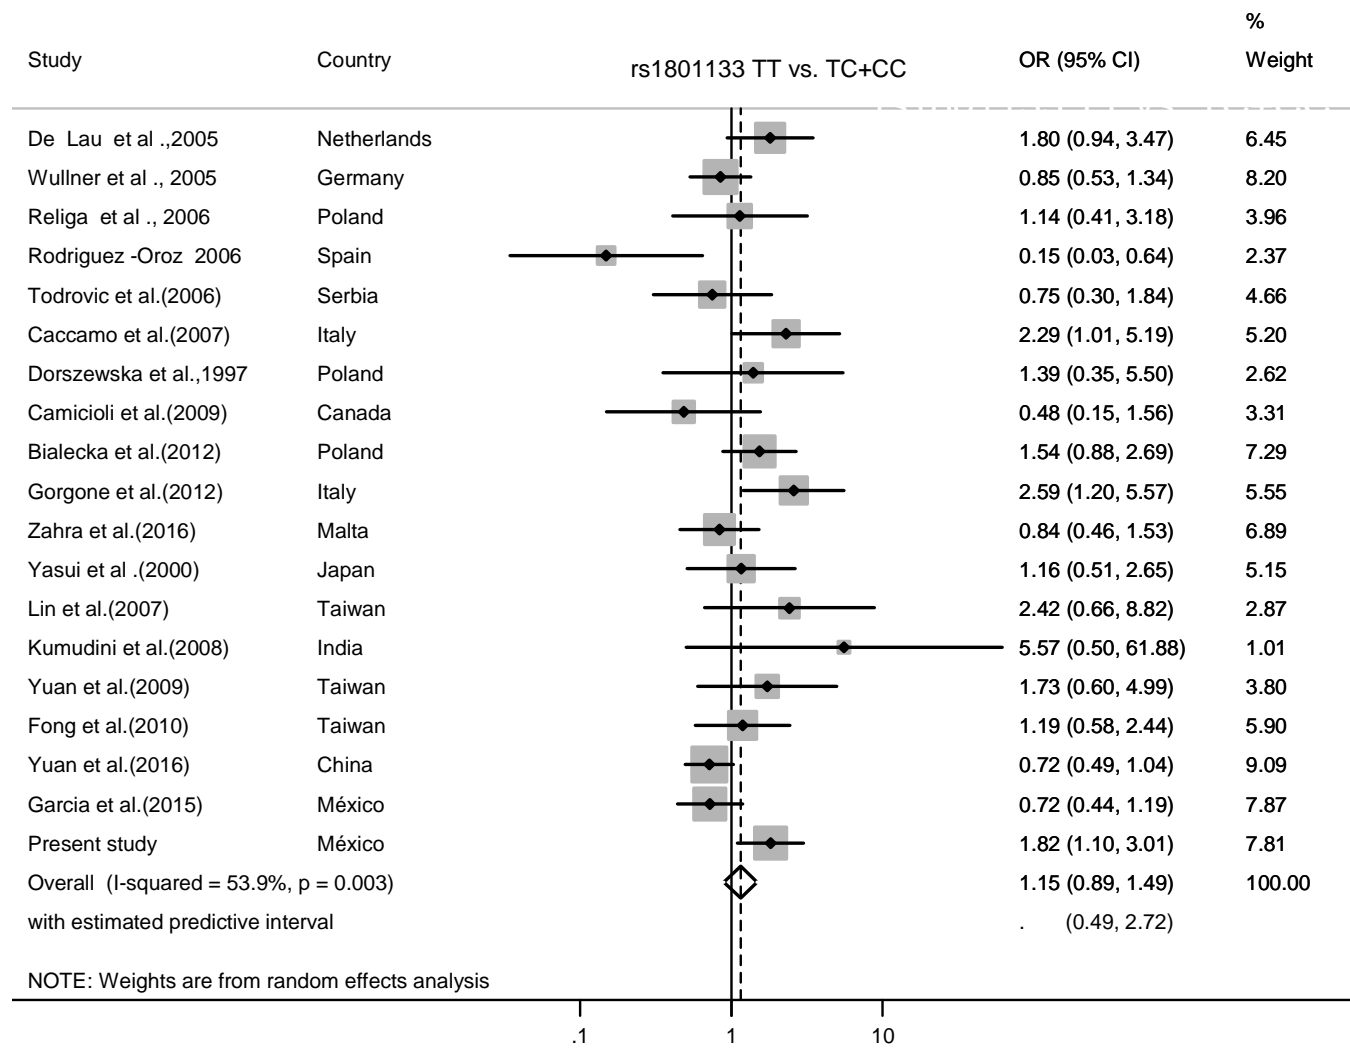

Figure 3. Forest plots from the meta-analysis of MTHFR rs1801133 (TT vs. TC+ CC) genotypes' PD-risk association in the PD subgroup. "OR" odds ratio



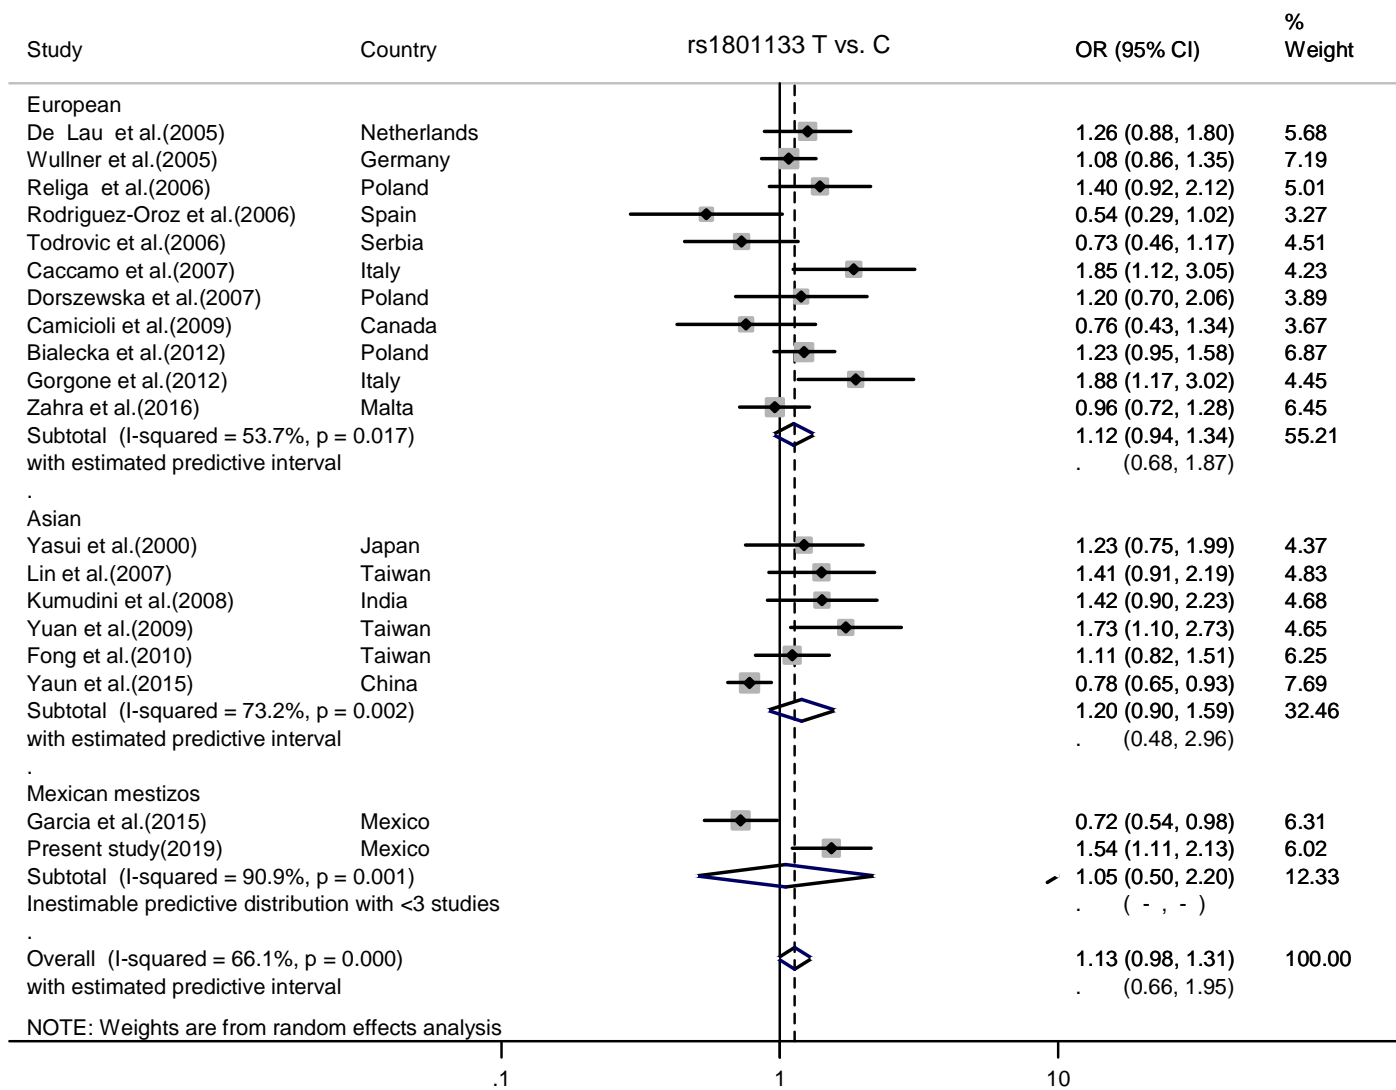

Figure 4. Forest plot from the meta-analysis of MTHFR rs1801133 (T vs. C)'s PD risk association in the PD subgroup stratified by ethnicity. "OR" odds ratio.

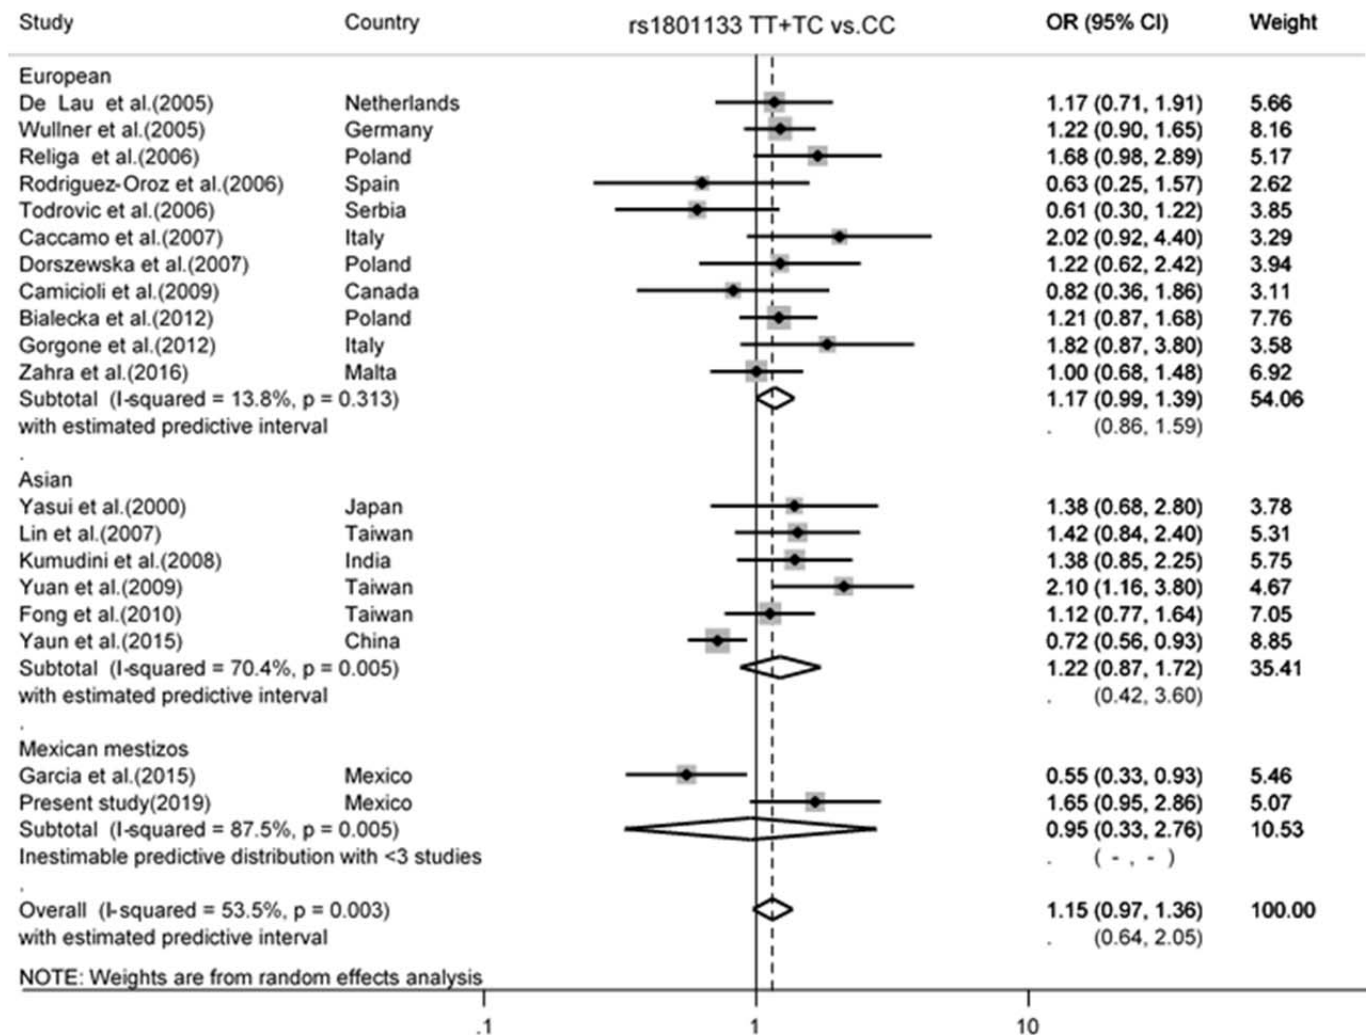

Figure 5. Forest plots from the meta-analysis of MTHFR rs1801133 (TT+TC vs. CC) genotypes' PD-risk association in the PD subgroup stratified by ethnicity. "OR" odds

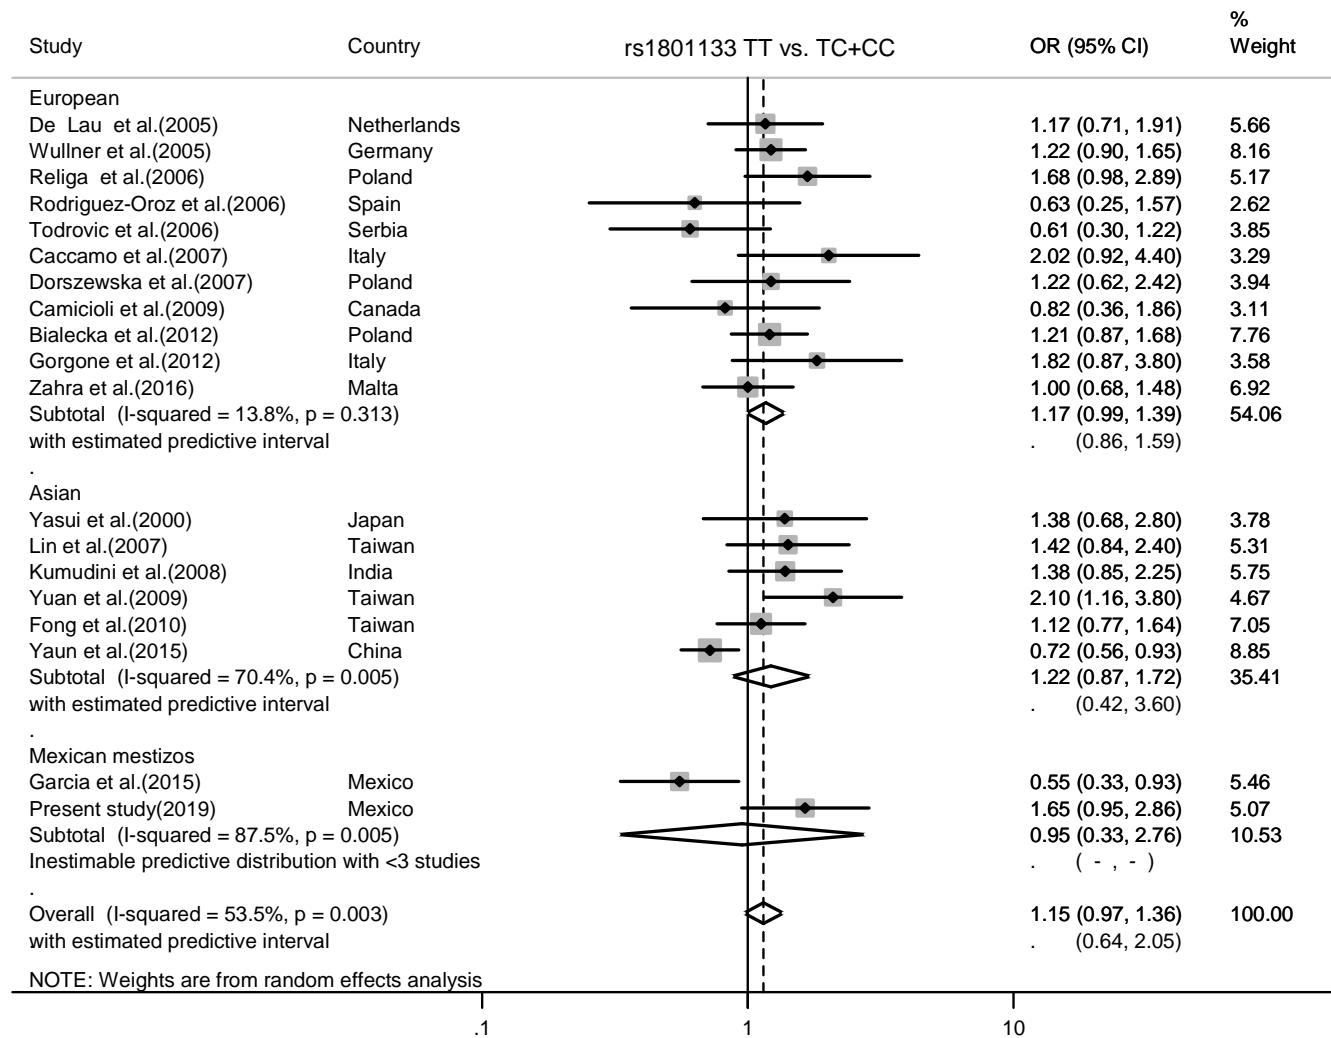

Figure 6. Forest plots from the meta-analysis of MTHFR rs1801133 (TT vs. TC + CC) genotypes' PD-risk association in the PD subgroup stratified by ethnicity. "OR" odds ratio

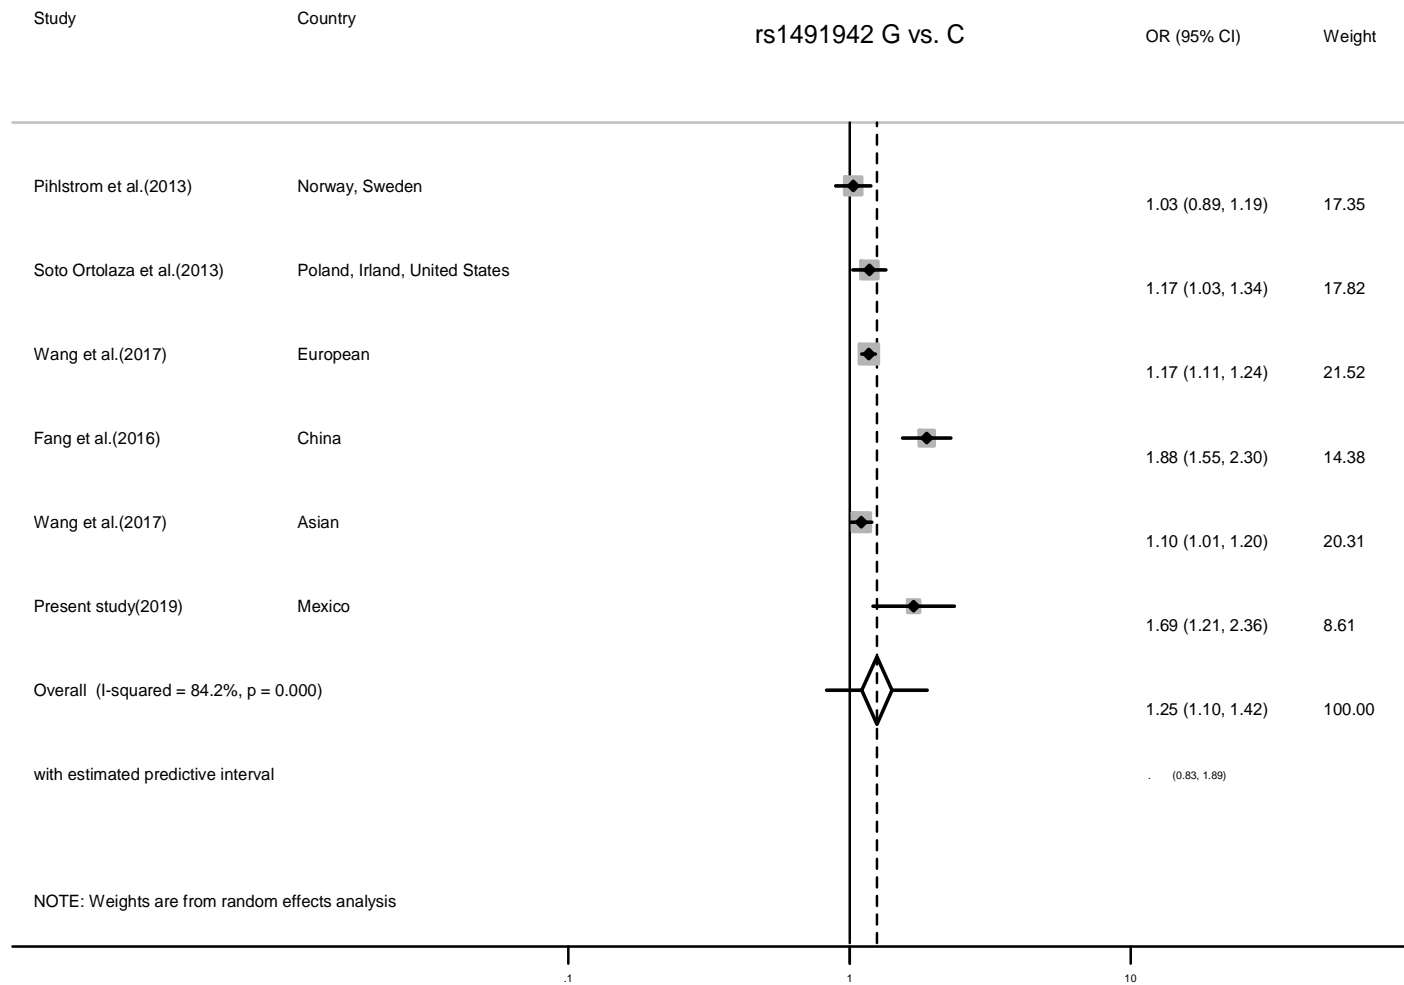

Figure 7. Forest plots from the meta-analysis of LRRK2 rs1491942 (G vs. C) allele’s PD risk association in the combined sample. “OR” odds ratio

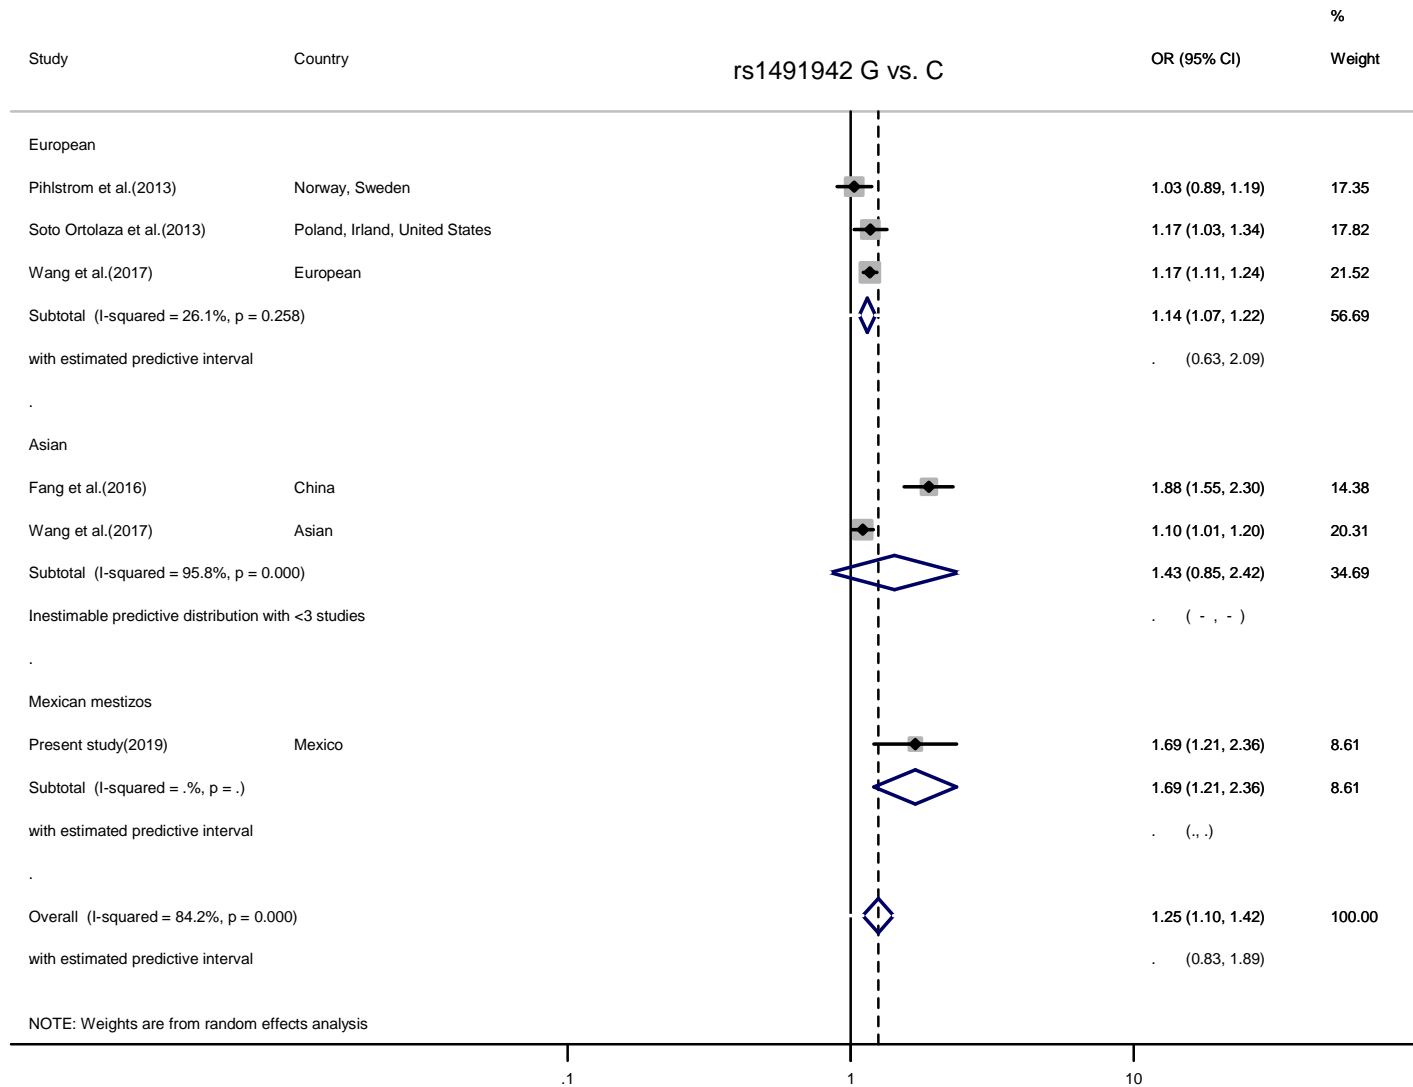

Figure 8. Forest plots from the meta-analysis of LRRK2 rs1491942 allele's PD risk association in the PD subgroup stratified by ethnicity. "OR" odds ratio
